# Supplementary material for: Controllable synthesis 3D hierarchical structured MnO2@NiCo2O4 and its morphology-dependent activity
Source: Royal Society of Chemistry journal article supplement (doi:10.1039/c7qi00637c), 2017-11-27
Supplement: c7qi00637c1.pdf [file c7qi00637c1.pdf]

# Supplementary Information

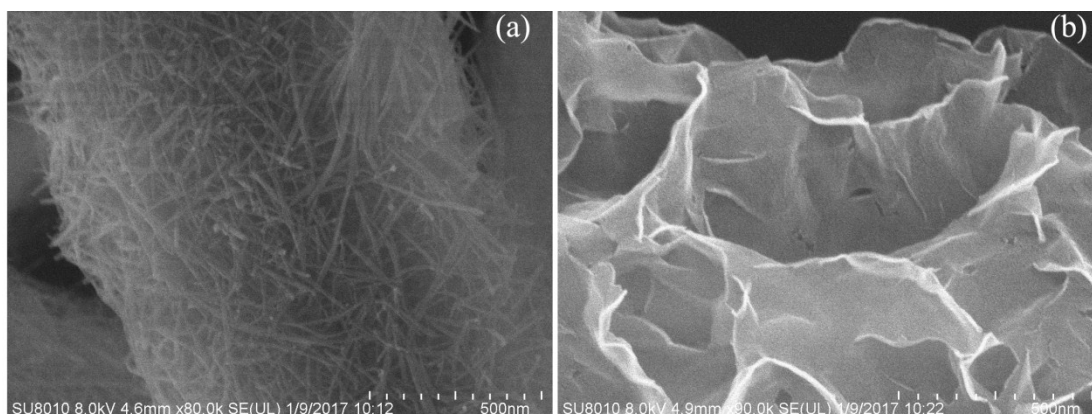

**Fig. S1.** SEM images of the precursors of  $\alpha\text{-MnO}_2@_2\text{NiCo}_2\text{O}_4$ : (a) nanowire; (b) nanosheet

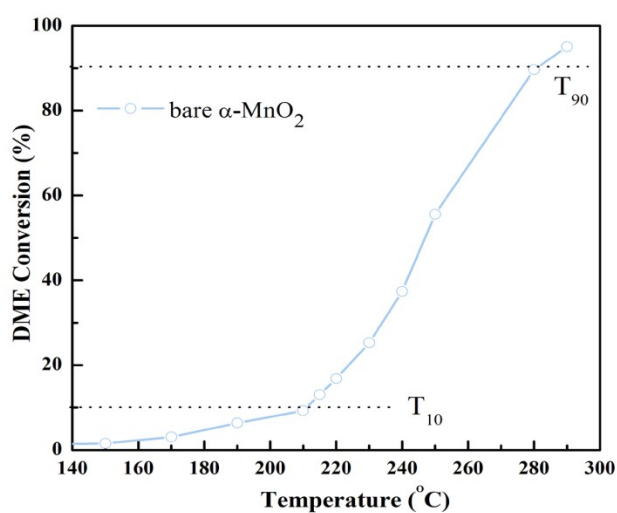

**Fig.S2** the catalytic combustion activity of bare  $\alpha\text{-MnO}_2$ .

Table S1  
Some of the reported catalysts for DME combustion

| Catalyst                                                             | $T_{10}/^{\circ}\text{C}$ | $T_{90}/^{\circ}\text{C}$ | Reference |
|----------------------------------------------------------------------|---------------------------|---------------------------|-----------|
| $\alpha\text{-MnO}_2\text{@NiCo}_2\text{O}_4$ nanowire               | 175                       | 198                       | Our work  |
| $\alpha\text{-MnO}_2\text{@NiCo}_2\text{O}_4$ nanosheet              | 152                       | 169                       | Our work  |
| $\text{CoFe}_2\text{O}_4$                                            | ca.300                    | ca.410                    | 1         |
| 2PtAl                                                                | 106                       | ca.310                    | 2         |
| $\text{LaMnO}_3$                                                     | 210                       | 295                       | 3         |
| $\text{Zn}_{0.8}\text{Mn}_{0.2}\text{Fe}_{2.4}\text{O}_4$            | 257                       | 276                       | 4         |
| $\text{BaNi}_{0.8}\text{Mn}_{0.2}\text{Al}_{11}\text{O}_{19-\delta}$ | 130                       | ca.340                    | 5         |
| $\text{Pt/Al}_2\text{O}_3$                                           | ca.140                    | ca.220                    | 6         |
| $\text{Pt/ZrO}_2$                                                    | ca.180                    | ca.360                    | 7         |
| $\alpha\text{-MnO}_2$ nanorod                                        | 170                       | 238                       | 8         |
| $\text{Mn}_3\text{O}_4\text{-OMS-2}$                                 | 163                       | 230                       | 9         |

Reference:

1. Z.-Y. Tian, P. Mountapmbeme Kouotou, A. El Kasmi, P. H. Tchoua Ngamou, K. Kohse-Höinghaus, H. Vieker, A. Beyer and A. Götzhäuser, *Proc. Combust. Inst.*, 2015, **35**, 2207-2214.
2. S. Colussi, A. Gayen, J. Llorca, C. de Leitenburg, G. Dolcetti and A. Trovarelli, *Ind. Eng. Chem. Res.*, 2012, **51**, 7510-7517.
3. R. Dinamarca, C. Sepúlveda, E. J. Delgado, O. Peña, J. L. G. Fierro and G. Pecchi, *J. Catal.*, 2016, **338**, 47-55.
4. Z. Beji, M. Sun, L. S. Smiri, F. Herbst, C. Mangeney and S. Ammar, *RSC Adv.*, 2015, **5**, 65010-65022.
5. Q. Yu, L. Yu, Y. Wang, Q. Zhang, M. Sun, Y. Huang, Y. Lu and Z. Ge, *Chin. J. Chem. Eng.*, 2008, **16**, 389-393.
6. F. Solymosi, J. Cserényi and L. Ovári, *Catal. Lett.*, 1997, **44**, 89-93.
7. A. Ishikawa, M. Neurock and E. Iglesia, *J. Am. Chem. Soc.*, 2007, **129**, 13201-13212.
8. G. Cheng, L. Yu, B. He, M. Sun, B. Zhang, W. Ye and B. Lan, *Appl. Surf. Sci.*, 2017, **409**, 223-231.
9. M. Sun, W. Li, B. Zhang, G. Cheng, B. Lan, F. Ye, Y. Zheng, X. Cheng and L. Yu, *Chem. Eng. J.*, 2018, **331**, 626-635.
